# Supplementary material for: Canopy Area of Large Trees Explains Aboveground Biomass Variations across Nine Neotropical Forest Landscapes
Source: Copernicus journal article supplement (doi:10.5194/bg-2017-547), 2018-01-05
Supplement: Supplementary file 1 [file bg-2017-547-supplement.pdf]

1 Supplement

2

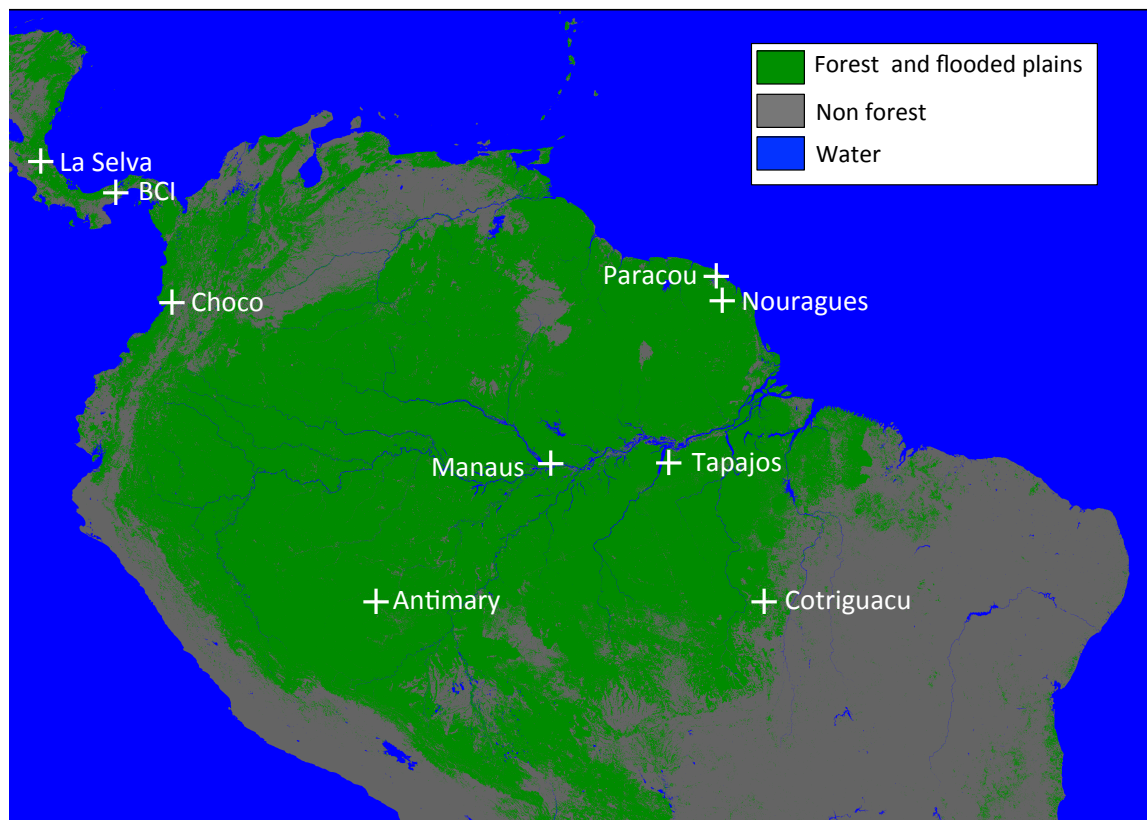

3  
4  
5

**Figure S1.** Location of the nine study sites (Globcover). All sites are located in old growth tropical forests.

6

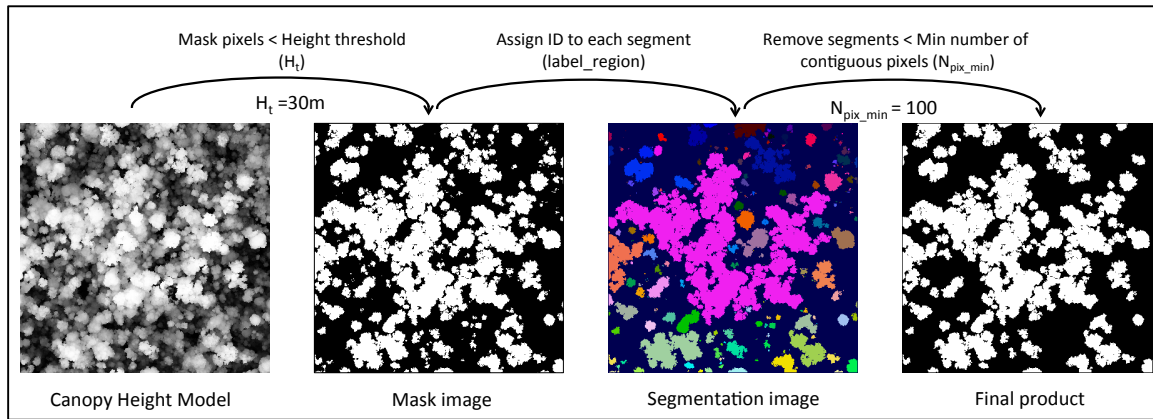

7

8 **Figure S2** : Description of steps taken from the original Lidar canopy height model to the final LCA product. This  
9 example is a 400 m by 400 m area in BCI, with a Height threshold of 30 m and the minimum number of contiguous  
10 pixels set to 100.

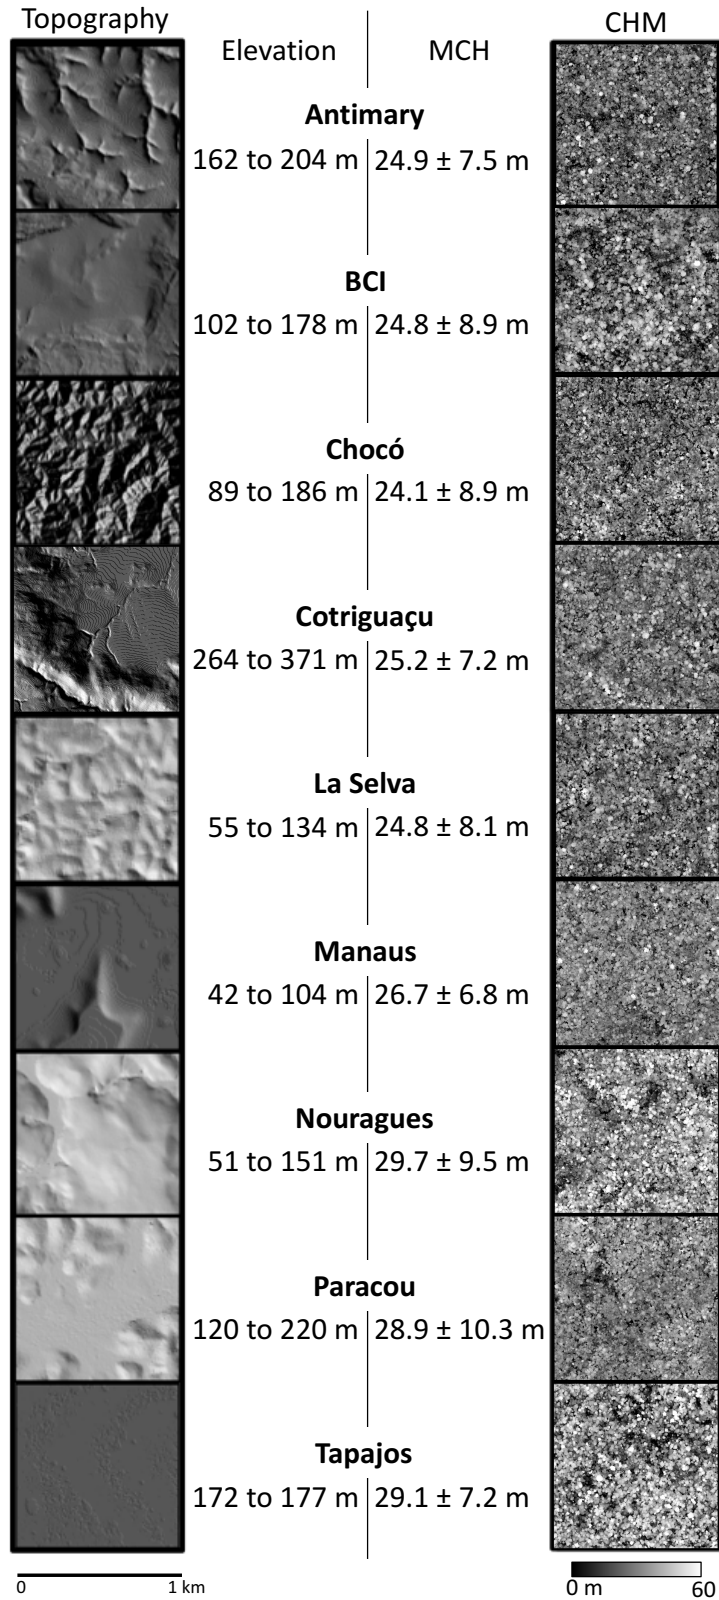

11 **Figure S3.** Lidar derived images: shaded relief of topography and canopy height model (CHM), at 1 m resolution.  
 12 Mean canopy height (MCH), standard deviation of canopy height and elevation range are reported.  
 13  
 14

## 15 **S.1 Estimating aboveground biomass from forest inventories.**

16  
17 For trees with no height measurement, a site specific DBH height model was used to infer tree  
18 height in each site, as described in previous studies (Feldpauch et al., 2012; Meyer et al., 2013,).  
19 Wood density was extracted from the global wood density database for tropical trees (Chave et  
20 al., 2009; Zanne et al., 2009) for each tree, based on its level of botanical identification (species,  
21 genus, family). Trees with no botanical identification were assigned the average wood density of  
22 the plot. Average wood density of each site was calculated as the unweighted average of all trees  
23 within a site, or was taken from a previous study in the case of Cotriguaçu (Fearnside, 1997).  
24 Average wood density of large trees was calculated as the unweighted average of trees with  
25  $DBH \geq 50$  cm in each site. Tree level AGB was aggregated at the plot level using a commonly  
26 used allometric regression model for moist tropical forests (Eq. (S1), Chave et al., 2005), except  
27 for La Selva and Chocó, for which a model for wet tropical forest (Eq. (S2), Chave et al., 2005)  
28 and a local allometric model (Eq. (S3), Duque et al., 2017) were used, respectively.

$$29 \quad AGB_{moist} = 0.0509 \times \rho DBH^2 H \quad (S1)$$

$$30 \quad AGB_{wet} = 0.0776 \times (\rho DBH^2 H)^{0.940} \quad (S2)$$

$$31 \quad AGB_{Chocó} = 0.089 \times (\rho DBH^2 H)^{0.951} \quad (S3)$$

32 where trunk diameter ( $DBH$  in cm) is measured during the inventory, tree height ( $H$ , in m) is  
33 either measured in the field or estimated from a local  $DBH$ – $H$  model, and specific gravity or  
34 wood density ( $\rho$  in  $g\ cm^{-3}$ ) is known for each tree. AGB (in kg of dry biomass) of individual  
35 trees estimated using the former equations was used to calculate plot level AGB density ( $Mg\ ha^{-1}$ )  
36 by summing over the biomass of all stems within each plot. Ground estimated AGB density is  
37 henceforth referred to as  $AGB_{inv}$ . Estimating AGB with these allometric models has been

38 reported to have a standard error of 12.5 % when using height as a parameter, against 19.5 %  
39 when height is not available (Chave et al., 2005).

40

41 **Table S1.** Coefficients,  $R^2$  and RMSE for the local models used to estimate AGB from MCH in the different sites,  
 42 based on available ground data.

| Site              | a       | b      | $R^2$ | RMSE  | plot size |
|-------------------|---------|--------|-------|-------|-----------|
| <b>Antimary</b>   | 0.1687  | 2.2544 | 0.62  | 45.3  | 0.25      |
| <b>BCI</b>        | 2.3257  | 1.4336 | 0.68  | 28.14 | 1         |
| <b>Chocó</b>      | 10.7328 | 1.0509 | 0.66  | 33.34 | 0.25      |
| <b>Cotriguacu</b> | 3.0249  | 1.3895 | -     | -     | -         |
| <b>La Selva</b>   | 2.1241  | 1.3889 | 0.84  | 11.45 | 1         |
| <b>Manaus</b>     | 3.0249  | 1.3895 | 0.59  | 43.73 | 0.25      |
| <b>Nouragues</b>  | 5.7963  | 1.242  | 0.46  | 59.19 | 1         |
| <b>Paracou</b>    | 5.707   | 1.239  | 0.58  | 40.49 | 1         |
| <b>Tapajos</b>    | 3.0249  | 1.3895 | 0.59  | 43.73 | 0.25      |

43

44

45

46 **Table S2.** Matrices of canopy height thresholds (20 m to 50 m, presented with a 5 m increment for readability  
 47 purposes) and crown area thresholds (50 to 200 pixels or m<sup>2</sup>), represented respectively by the minimum height  
 48 considered for segmentation and by the minimum number of contiguous 1m pixels in a segment. Values are given in  
 49 percentage of coverage of the 1km<sup>2</sup> subsets.

| Site       | Number of pixels | 20 m<br>threshold | 25 m<br>threshold | 30 m<br>threshold | 35 m<br>threshold | 40 m<br>threshold | 45 m<br>threshold | 50 m<br>threshold |
|------------|------------------|-------------------|-------------------|-------------------|-------------------|-------------------|-------------------|-------------------|
| Antimary   | 50               | 75.30             | 48.32             | 22.19             | 8.23              | 2.12              | 0.46              | 0.06              |
|            | 100              | 75.03             | 47.40             | 20.92             | 7.64              | 1.92              | 0.43              | 0.05              |
|            | 150              | 74.84             | 46.55             | 19.82             | 7.03              | 1.75              | 0.41              | 0.04              |
|            | 200              | 74.81             | 45.89             | 18.93             | 6.33              | 1.60              | 0.34              | 0.04              |
| BCI        | 50               | 70.06             | 51.53             | 29.19             | 11.66             | 2.51              | 0.25              | 0.05              |
|            | 100              | 69.79             | 50.92             | 28.21             | 11.08             | 2.30              | 0.21              | 0.05              |
|            | 150              | 69.48             | 50.38             | 27.44             | 10.52             | 2.06              | 0.17              | 0.05              |
|            | 200              | 69.35             | 49.96             | 26.67             | 10.06             | 1.95              | 0.16              | 0.05              |
| Chocó      | 50               | 70.48             | 48.64             | 23.22             | 7.72              | 1.88              | 0.24              | 0.02              |
|            | 100              | 70.20             | 47.58             | 21.31             | 6.45              | 1.53              | 0.18              | 0.00              |
|            | 150              | 69.97             | 46.81             | 19.83             | 5.52              | 1.17              | 0.09              | 0.00              |
|            | 200              | 69.84             | 46.05             | 18.19             | 4.83              | 0.94              | 0.06              | 0.00              |
| Cotriguaçu | 50               | 80.07             | 53.85             | 25.93             | 8.12              | 1.65              | 0.24              | 0.02              |
|            | 100              | 79.91             | 52.87             | 24.70             | 7.33              | 1.43              | 0.21              | 0.02              |
|            | 150              | 79.85             | 52.08             | 23.23             | 6.48              | 1.26              | 0.18              | 0.02              |
|            | 200              | 79.84             | 51.71             | 21.92             | 5.70              | 1.12              | 0.18              | 0.02              |
| La Selva   | 50               | 74.32             | 50.22             | 24.00             | 7.88              | 1.95              | 0.27              | 0.06              |
|            | 100              | 74.15             | 49.30             | 22.71             | 7.17              | 1.70              | 0.25              | 0.05              |
|            | 150              | 74.05             | 48.69             | 21.57             | 6.55              | 1.47              | 0.21              | 0.05              |
|            | 200              | 74.01             | 48.03             | 20.57             | 6.01              | 1.22              | 0.11              | 0.03              |
| Manaus     | 50               | 86.07             | 66.42             | 33.69             | 9.02              | 1.63              | 0.41              | 0.08              |
|            | 100              | 86.04             | 65.99             | 32.72             | 7.91              | 1.48              | 0.38              | 0.07              |
|            | 150              | 86.03             | 65.69             | 31.20             | 6.99              | 1.17              | 0.34              | 0.03              |
|            | 200              | 86.00             | 65.51             | 29.87             | 6.08              | 1.05              | 0.32              | 0.03              |
| Nouragues  | 50               | 85.14             | 69.77             | 48.77             | 28.82             | 13.34             | 4.05              | 0.79              |
|            | 100              | 85.05             | 69.37             | 47.86             | 27.73             | 12.45             | 3.56              | 0.60              |
|            | 150              | 84.93             | 69.16             | 47.23             | 26.67             | 11.41             | 3.02              | 0.44              |
|            | 200              | 84.89             | 68.87             | 46.62             | 25.73             | 10.30             | 2.51              | 0.29              |
| Paracou    | 50               | 84.56             | 63.40             | 31.82             | 9.56              | 1.83              | 0.17              | 0.00              |
|            | 100              | 84.50             | 62.90             | 30.18             | 8.47              | 1.46              | 0.10              | 0.00              |
|            | 150              | 84.46             | 62.43             | 28.64             | 7.36              | 1.10              | 0.05              | 0.00              |
|            | 200              | 84.42             | 62.18             | 27.61             | 6.30              | 0.82              | 0.23              | 0.00              |
| Tapajós    | 50               | 79.61             | 66.61             | 51.61             | 33.46             | 15.15             | 4.06              | 0.60              |
|            | 100              | 79.46             | 66.24             | 51.37             | 32.89             | 14.42             | 3.56              | 0.48              |
|            | 150              | 79.35             | 65.98             | 45.89             | 31.80             | 13.51             | 3.19              | 0.35              |
|            | 200              | 79.34             | 65.69             | 50.18             | 30.92             | 12.64             | 2.67              | 0.26              |

50  
51

52 **Table S3.** Coefficients,  $R^2$ , RMSE and bias for the models used to estimate AGB from MCH without and with wood  
 53 density (WD) as a weighting factor

| Model           | Equation                   | a    | b    | $R^2$ | RMSE  | Bias | $R^2$<br>cross-val | RMSE<br>cross-val | Bias<br>cross-val |
|-----------------|----------------------------|------|------|-------|-------|------|--------------------|-------------------|-------------------|
| <b>m_MCH</b>    | $AGB = aMCH^b$             | 0.91 | 1.77 | 0.68  | 54.76 | -0.3 | 0.67               | 55.38             | -0.54             |
| <b>m_MCH_wd</b> | $AGB = a(MCH \times WD)^b$ | 9.29 | 1.23 | 0.79  | 44.23 | 0.02 | 0.79               | 44.78             | 0.01              |

54  
 55  
 56



57

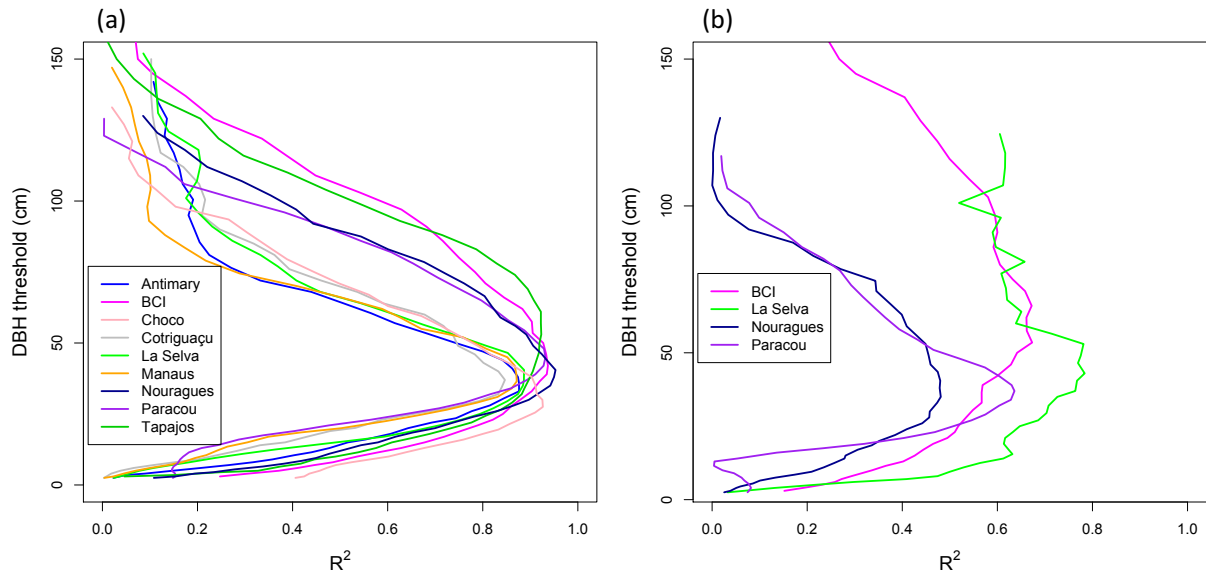

58

59 **Figure S4.** Distribution of  $R^2$  between DBH thresholds and  $AGB_{Lidar}$  in 1 ha subareas (a) and  $AGB_{inv}$  in 1 ha inventory  
60 plots (b). DBH was calculated from tree height using Chave's E factor model (Chave et al., 2014)

61

62

## 63 **S.2 LCA and ground data**

64 We looked at the relation between LCA and other stand level metrics:  $AGB_{inv}$  of large trees,  
65 stand basal area, Lorey's height ( $H_L$ ), and the number of large trees. Lorey's height is defined by

66  $H_L = \frac{\sum_{i=1}^N BA_i H_i}{\sum_{i=1}^N BA_i}$  where  $H_i$  is the height of stem  $i$ , and  $BA_i$  is the basal area of stem  $i$ . Weighting

67 tree height with basal area increases the relative importance of large trees in a stand (Lefsky,  
68 2010).

69 There was a significant correlation between LCA and  $AGB_{inv}$  in all calibration sites ( $R^2_{max} = 0.77$   
70 in La Selva), and even more so between LCA and  $AGB_{inv}$  of large trees ( $R^2_{max} = 0.83$  in La  
71 Selva) (Table S4). LCA correlated with Lorey's height, especially at La Selva but less so at  
72 Nouragues ( $R^2_{LaSelva} = 0.86$ ,  $R^2_{Nouragues} = 0.21$ ). We also found that LCA and total basal area are  
73 correlated. The relationship between LCA and the number of large trees is significant in all sites,  
74 but it is lower than other structural metrics in Paracou ( $R^2 = 0.32$ ). Among study sites, La Selva  
75 and BCI show higher correlations between LCA and ground derived metrics. The strong  
76 correlation of LCA with plot level  $AGB_{inv}$  as well as with  $AGB_{inv}$  of large trees suggested that a  
77 model based on LCA can be used as an estimator of AGB.

78

79 **Table S4** : Coefficients of correlation ( $R^2$ ) between LCA and ground data derived metrics :  $AGB_{inv}$ ,  $AGB_{inv}$  of  
 80 trees  $\geq 50$  cm DBH, basal area, Lorey's height and number of large trees in BCI, La Selva, Nouragues and Paracou.

|                               | <b>BCI</b> | <b>La Selva</b> | <b>Nouragues</b> | <b>Paracou</b> |
|-------------------------------|------------|-----------------|------------------|----------------|
| <b><math>AGB_{inv}</math></b> | 0.64       | 0.77            | 0.48             | 0.64           |
| <b><math>AGB_{50}</math></b>  | 0.68       | 0.83            | 0.47             | 0.69           |
| <b>BA</b>                     | 0.63       | 0.53            | 0.41             | 0.43           |
| <b>LH</b>                     | 0.57       | 0.86            | 0.21             | 0.63           |
| <b><math>N_{70}</math></b>    | 0.64       | 0.76            | 0.46             | 0.32           |

81

82

### 83 **S.3 Contribution of Large Trees to $AGB_{inv}$**

84 First, we explored the role of wood density as a key variable in allometric models to scale the  
85 tree volume or size to  $AGB_{inv}$  (Brown et al., 1989; Chave et al., 2005; Chave et al., 2014,  
86 Ngomanda et al., 2014). We examined the variations of wood density as a function of DBH  
87 classes in all sites and for all trees greater than 10 cm arranged in 10 cm DBH bins.

88 We then assessed the proportion of large trees by examining the DBH frequency distribution of  
89 trees at different sites using the field inventory data, and compared it to the distribution of  
90  $AGB_{inv}$  for the same DBH ranges, using 1 cm bins to create DBH classes.

#### 91 **Results**

92 DBH and wood density: At BCI, mean wood density decreased significantly with increasing  
93 DBH ( $p < 0.001$ ,  $R^2 = 0.92$ ), which is consistent with the results of a previous study (Chave et al.,  
94 2004). On the contrary, at Chocó, mean wood density increased significantly with increasing  
95 DBH ( $p < 0.001$ ,  $R^2 = 0.8$ ). No significant trend was found at the other study sites (Fig. S5). These  
96 results show that stand average wood density and wood density of large trees are not  
97 significantly different in four sites and can therefore be used interchangeably in a model using  
98 these data. However, using one or the other will have an impact on the results of a model  
99 calibrated using data from BCI or Chocó. Mean wood density of trees  $\geq 50$  cm is 0.49 in BCI (vs.  
100 stand average  $WD = 0.54 \text{ g cm}^{-3}$ ) and 0.66 in Chocó (vs. stand average  $WD = 0.60 \text{ g cm}^{-3}$ ).

101

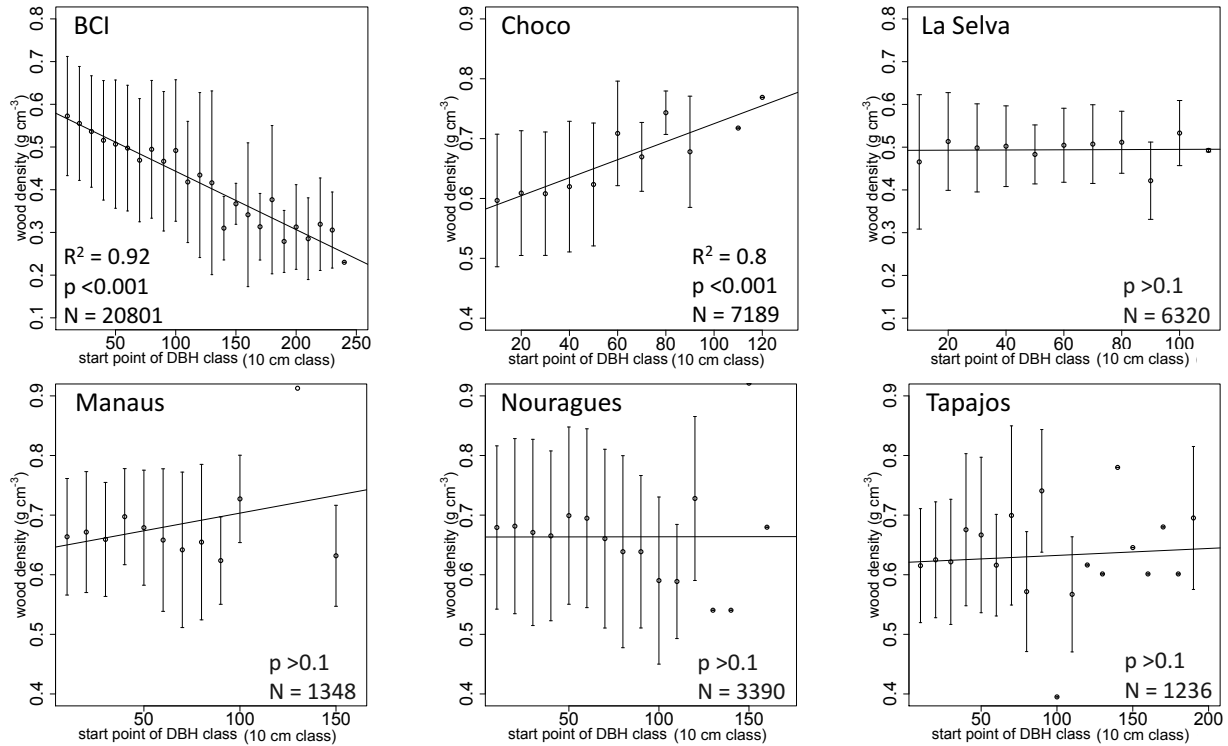

102

103 **Figure S5.** Wood density and DBH classes in BCI, Chocó, La Selva, Manaus, Nouragues and Tapajós. The decrease  
 104 in mean wood density is significant in BCI ( $p < 0.001$ ,  $R^2 = 0.92$ ). The increase in mean wood density is significant in  
 105 Chocó ( $p < 0.001$ ,  $R^2 = 0.8$ ) but there is no significant wood density change across DBH classes in the other sites  
 106 ( $p > 0.1$ ). Points with no standard deviation bars mean that only one tree was present in the class.

107

108 We found that using mean wood density of trees  $\geq 50$  cm DBH in our LCA model gives slightly

109 better results than using mean wood density (see Eq. (3)), with  $R^2$  of 0.78, RMSE of 45.34 Mg

110  $\text{ha}^{-1}$  and bias of  $-0.36 \text{ Mg ha}^{-1}$ .

111

112 DBH and AGB : The relationship between  $\text{AGB}_{\text{inv}}$  and the DBH frequency distribution was

113 similar in BCI, La Selva, Nouragues and Tapajós (Fig. S6). In these sites, more than 50 % of the

114 total  $\text{AGB}_{\text{inv}}$  was contributed by around 5 % (between 3 % and 6 %) of the stems, corresponding

115 to a threshold DBH of 58 cm, 50 cm, 55 cm and 61 cm respectively for the four study sites.

116 Similar results were found in a recent study focusing on the contribution on large trees to AGB

117 in Central Africa (Bastin et al., 2015). Also, 80 % of the AGB stock was in trees with  $\text{DBH} \geq 30$

118 cm DBH at BCI, 26 cm at La Selva, 32 cm at Nouragues and 29 cm at Tapajós, which echoes

119 results published on BCI (Chave et al., 2001). These represent only 20 % of the total number of  
 120 trees in each site (only 15 % in Tapajós). Chocó and Manaus had far less large trees, 50 % of  
 121 their total AGB<sub>inv</sub> being explained by respectively 10 % and 7 % of the total number of trees,  
 122 corresponding to a DBH greater than only 28 cm and 40 cm. In these two sites, 80 % of AGB<sub>inv</sub>  
 123 is found in trees above 17 cm and 23 cm, respectively, representing 37 % and 31 % of their total  
 124 number of trees. These findings corroborate with previous studies from other sites and suggests  
 125 that large trees can explain AGB variations and could potentially be used to estimate biomass  
 126 without having to measure all trees in a plot (Bastin et al., 2015; Slik et al., 2013). Note that  
 127 some ground data from Manaus and Nouragues were included in Silk et al.'s dataset).

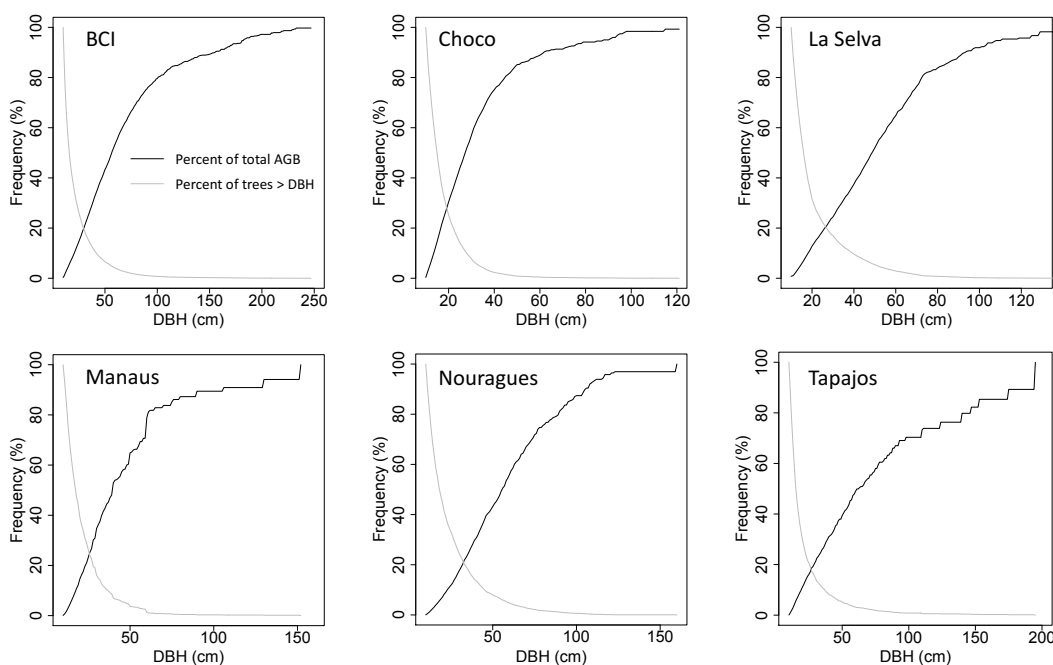

128  
 129 **Figure S6.** Cumulation of of AGB<sub>inv</sub> and of number of trees (total number of trees  $\geq 10$  cm DBH) as a function of  
 130 DBH in BCI, Chocó, La Selva, Manaus, Nouragues and Tapajós plots.  
 131

132  
 133 **References (Supplement)**

135 Chave, J., Riéra, B., and Dubois, M. A.: Estimation of biomass in a neotropical forest of French  
 136 Guiana: spatial and temporal variability. *J. Trop. Ecol.*, 17(01), 79-96, 2001.  
 137

138 Chave, J., Andalo, C., Brown, S., Cairns, M., Chambers, J., Eamus, D., Folster, H., Fromard, F.,  
139 Higuchi, N., Kira, T., Lescure, J. P., Nelson, B., Ogawa, H., Puig, H., Rié ra, B., and Ya-  
140 T.: Tree allometry and improved estimation of carbon stocks and balance in tropical forests,  
141 *Oecologia*, 145, 87–99, 2005.

142

143 Chave, J., Coomes D. A., Jansen S, Lewis, S. L., Swenson, N. G. and Zanne, A. E.: Towards a  
144 worldwide wood economics spectrum. *Ecol. Lett.* 12(4), 351-366.  
145 <http://dx.doi.org/10.1111/j.1461-0248.2009.01285.x>, 2009.

146

147 Duque, A., Saldarriaga, J., Meyer, V., and Saatchi, S.: Structure and allometry in tropical forests  
148 of Chocó, Colombia. *Forest Ecol. Manag.*, 405, 309-318, 2017.

149

150 Feldpausch, T. R., Lloyd, J., Lewis, S. L., Brienen, R. J., Gloor, M., Monteagudo Mendoza, A.,  
151 Lopez-Gonzalez, G., Banin, L., Abu Salim, K., Affum-Baffoe, K. and Alexiades, M.: Tree height  
152 integrated into pantropical forest biomass estimates. *Biogeosciences*, pp.3381-3403, 2012.

153

154 Lefsky, M. A.: A global forest canopy height map from the Moderate Resolution Imaging  
155 Spectroradiometer and the Geoscience Laser Altimeter System, *Geophys. Res. Lett.*, 37, L15401,  
156 doi:10.1029/2010GL043622, 2010.

157

158 Ngomanda, A., Obiang, N. L. E., Lebamba, J., Mavouroulou, Q. M., Gomat, H., Mankou, G. S.  
159 and Picard, N.: Site-specific versus pantropical allometric equations: Which option to estimate the  
160 biomass of a moist central African forest?. *Forest Ecol. Manag.*, 312, 1-9., 2014.

161

162 Zanne, A. E., Lopez-Gonzalez, G., Coomes, D. A., Ilic, J., Jansen, S., Lewis, S. L., Miller, R. B.,  
163 Swenson, N. G., Wiemann, M. C., and Chave, J.: Global wood density database. *Dryad*. Identifier:  
164 <http://hdl.handle.net/10255/dryad.235>, 2009.

165

166

167
